# Supplementary material
Source: PubMed Central journal article supplement (PMC9298709)
Supplement: 41575_2022_649_MOESM1_ESM.pdf [file 41575_2022_649_MOESM1_ESM.pdf]

**Supplementary information**

---

**A roadmap for serum biomarkers for hepatitis B virus: current status and future outlook**

---

In the format provided by the authors and unedited

Supplementary Table 1. Key features of classic serum biomarkers: HBV DNA, HBeAg and/ or anti-HBe, HBsAg, anti-HBs and anti-HBc

| <sup>a</sup> Source <sup>1</sup>                                                                                                                                      | Clinical Relevance<br>During Natural Infection                                                                                                                                                                                                                                                                                                                                                                                                                                                                                                                      | Clinical Relevance<br>Following Treatment                                                                                                                                                                                                                                                                                                                                                                                                                                                                                                                     | <sup>b</sup> Detection                                                                                                                                                                                                                                                                                                                                                                                                                                                                                                                                                                                                                         |
|-----------------------------------------------------------------------------------------------------------------------------------------------------------------------|---------------------------------------------------------------------------------------------------------------------------------------------------------------------------------------------------------------------------------------------------------------------------------------------------------------------------------------------------------------------------------------------------------------------------------------------------------------------------------------------------------------------------------------------------------------------|---------------------------------------------------------------------------------------------------------------------------------------------------------------------------------------------------------------------------------------------------------------------------------------------------------------------------------------------------------------------------------------------------------------------------------------------------------------------------------------------------------------------------------------------------------------|------------------------------------------------------------------------------------------------------------------------------------------------------------------------------------------------------------------------------------------------------------------------------------------------------------------------------------------------------------------------------------------------------------------------------------------------------------------------------------------------------------------------------------------------------------------------------------------------------------------------------------------------|
| <b>HBV DNA</b>                                                                                                                                                        |                                                                                                                                                                                                                                                                                                                                                                                                                                                                                                                                                                     |                                                                                                                                                                                                                                                                                                                                                                                                                                                                                                                                                               |                                                                                                                                                                                                                                                                                                                                                                                                                                                                                                                                                                                                                                                |
| Derived following reverse transcription of HBV pgRNA, exclusively transcribed from cccDNA; found intracellularly in capsids and extracellularly in infectious virions | Hallmark of infection; Highest HBV DNA levels in high replicative and low inflammatory phase, decreasing during immune clearance <sup>1</sup>                                                                                                                                                                                                                                                                                                                                                                                                                       | Treatment-induced suppression correlates with lower risk of liver disease progression and HCC <sup>2</sup> ; during NUC treatment, serum HBV DNA suppression is incomplete, cccDNA persistence can lead to relapse following NUC cessation <sup>3</sup> ; resistance to NUCs can lead to increased HBV DNA in serum <sup>4</sup>                                                                                                                                                                                                                              | Commercially available assays: Abbott realtime HBV LLOD 10 IU/mL (0.5 mL serum); 15 IU/mL (0.2 mL serum) (quantitative, platform); Abbott Alinity m LLOQ 10 IU/ml, LLOD 9.6 IU/mL (serum); 6.7 IU/mL (plasma) (quantitative, platform); Roche Cobas LLOD 2.4 IU/mL (serum); 2.7 IU/mL (plasma) (quantitative, platform); Roche 6800 LLOQ 10 IU/ml (quantitative, platform); Cepheid Xpert LLOQ 10 IU/ml; LLOD 3.2 IU/mL (plasma), 6.0 IU/mL (serum) (quantitative, platform)                                                                                                                                                                   |
| <b>HBeAg and/or anti-HBe</b>                                                                                                                                          |                                                                                                                                                                                                                                                                                                                                                                                                                                                                                                                                                                     |                                                                                                                                                                                                                                                                                                                                                                                                                                                                                                                                                               |                                                                                                                                                                                                                                                                                                                                                                                                                                                                                                                                                                                                                                                |
| Immunomodulatory protein <sup>5,6</sup> translated from preC mRNA <sup>7,8</sup> ; HBeAg appears early during infection, with anti-HBe antibodies appearing later     | HBeAg status defines CHB phases (HBeAg-positive or negative infection) <sup>9</sup> ; positivity correlates with high viremia, but negativity does not exclude liver disease <sup>10</sup> ; transition to HBeAg-negative CHB is associated with a reduction in cccDNA levels, transcriptional activity, and HBV DNA levels <sup>11</sup> ; HBeAg loss is associated with reduced disease activity and favourable long-term outcome <sup>12</sup> ; higher titres of anti-HBe, with anti-HBc IgG, might reflect cccDNA activity in HBsAg-negative CHB <sup>13</sup> | HBeAg loss and anti-HBe seroconversion can be an indication of virological remission, but the development of basal core promoter and/or precore mutations can lead to HBeAg-negativity with high viral loads <sup>14</sup> ; HBeAg to anti-HBe seroconversion identifies a primary endpoint in peg-IFN $\alpha$ and NUC treatment, with discontinuation in patients who are HBeAg positive <sup>9</sup> ; anti-HBe antibodies might influence the risk of viral reactivation after treatment discontinuation in patients who are HBeAg negative <sup>15</sup> | Commercially available assays: Roche Elecsys HBeAg assay (qualitative, ECLIA); Diasource LLOD 0.59 PE IU/mL; (qualitative, ELISA) DiaSorin LLOD 0.30 PE IU/mL (qualitative); Biorad Monolisa LLOD 0.64 PE IU/mL (qualitative); Abbott Alinity i LLOD 0.144 – 0.157 PE IU/mL (qualitative, platform); Abbott Architect LLOD $\leq$ 0.5 PE IU/mL (qualitative, CLIA); DiaSorin LIAISON <sup>®</sup> XL MUREX, HBeAg, LLOQ 0.10 PE IU/mL (quantitative, CLIA)<br><br>anti-HBe assays: Diasource LLOD 0.30 PE IU/mL (qualitative, ELISA); Biorad Monolisa LLOD 2.50 PE IU/mL (qualitative, ELISA); Roche Elecsys LLOD <0.2 WHO IU/mL (qualitative, |

|  |  |  |                                                                                                                                                                                                                                                                                                                                     |
|--|--|--|-------------------------------------------------------------------------------------------------------------------------------------------------------------------------------------------------------------------------------------------------------------------------------------------------------------------------------------|
|  |  |  | ECLIA); Abbott Alinity i LLOD 0.14 – 0.15 IU/mL (qualitative, CMIA); Abbott Architect LLOQ $\leq$ 0.45 PE IU/mL (quantitative, CMIA); DiaSorin LIAISON® XL MUREX, , LLOQ $\leq$ 0.076 PE IU/mL (quantitative, CLIA); Lumipulse®G600II LLOD 0.31 IU/mL and LLOQ 0.35 IU/mL (qualitative and quantitative, CLEIA, CLIA) <sup>13</sup> |
|--|--|--|-------------------------------------------------------------------------------------------------------------------------------------------------------------------------------------------------------------------------------------------------------------------------------------------------------------------------------------|

**HBsAg**

|                                                                                                                                                                                                                                                |                                                                                                                                                                                                                                                                                                                                                                                                                                                                                                                                                                                                                                                                                                                                                                                                                                                                                                                                             |                                                                                                                                                                                                                                                                                                                                                                                                                                                                                                                                                                                                                                                                                                                                                                                                                                                                                                                                                                                                                                                                                                                                                                                                                             |                                                                                                                                                                                                                                                                                                                                                                                                                                                                                                                                                                                                                                                                                                                                                      |
|------------------------------------------------------------------------------------------------------------------------------------------------------------------------------------------------------------------------------------------------|---------------------------------------------------------------------------------------------------------------------------------------------------------------------------------------------------------------------------------------------------------------------------------------------------------------------------------------------------------------------------------------------------------------------------------------------------------------------------------------------------------------------------------------------------------------------------------------------------------------------------------------------------------------------------------------------------------------------------------------------------------------------------------------------------------------------------------------------------------------------------------------------------------------------------------------------|-----------------------------------------------------------------------------------------------------------------------------------------------------------------------------------------------------------------------------------------------------------------------------------------------------------------------------------------------------------------------------------------------------------------------------------------------------------------------------------------------------------------------------------------------------------------------------------------------------------------------------------------------------------------------------------------------------------------------------------------------------------------------------------------------------------------------------------------------------------------------------------------------------------------------------------------------------------------------------------------------------------------------------------------------------------------------------------------------------------------------------------------------------------------------------------------------------------------------------|------------------------------------------------------------------------------------------------------------------------------------------------------------------------------------------------------------------------------------------------------------------------------------------------------------------------------------------------------------------------------------------------------------------------------------------------------------------------------------------------------------------------------------------------------------------------------------------------------------------------------------------------------------------------------------------------------------------------------------------------------|
| <p>A group of three proteins expressed from both cccDNA and integrated HBV DNA and embedded into the envelope of the infectious virions or forming spherical and filamentous subviral particles, which are non-infectious <sup>16,17</sup></p> | <p>Used to establish prevalence of HBV infection; CHB is diagnosed by a positive repeat test for HBsAg; highest HBsAg levels in HBeAg-positive, high replicative CHB phase, reducing in HBeAg-negative CHB and low replicative phases<sup>1</sup>; HBsAg titres modestly correlate with cccDNA levels and only in HBeAg-positive CHB<sup>18</sup>, which might direct most of the HBsAg production during HBeAg-negative CHB<sup>19</sup>; HBsAg seroclearance occurs annually in 0.1–2% of patients with CHB<sup>9,15</sup>; HBsAg level is a better predictor for HBsAg clearance than HBV DNA levels<sup>18,20,21</sup>; HBsAg level can predict HBsAg seroclearance during natural disease progression or with current therapies<sup>22,23</sup>; multiple virus and host factors can affect HBsAg production and secretion<sup>24</sup>; the relationship between HBsAg and cccDNA levels differs between studies, particularly in</p> | <p>HBsAg is a stable endpoint for off-treatment sustained response for NUCs and peg-IFN<math>\alpha</math><sup>25,33</sup>; HBsAg loss is rare but indicates immune control of viral replication associated with histological improvement<sup>34</sup>; NUCs have limited effect on HBsAg levels in patients who are treated<sup>35,36</sup>; low serum HBsAg levels might indicate low cccDNA levels and/or integrated HBV DNA and are the best predictor to date of the likelihood of relapse following treatment cessation<sup>37-39</sup>; <math>\geq 1 \log_{10}</math> IU/ml decline in HBsAg levels by week 12 of peg-IFN<math>\alpha</math> treatment is a strong predictor of sustained response<sup>18,40,41</sup>; peg-IFN<math>\alpha</math> treatment can induce substantial epigenetic suppression of cccDNA transcription even in the absence of immune responses<sup>42-44</sup>; reduction of HBV transcripts including HBx mRNA and reactivation of the host SMC5/6 complex<sup>45,46</sup> might have a key role in cccDNA silencing<sup>44,47</sup>; newer treatments using small interfering RNA, can reduce HBsAg levels<sup>48</sup>, sometimes accompanied by transient ALT flares<sup>49</sup></p> | <p>Commercial assays:<br/> Diasource LLOD 0.20 ng/mL (qualitative, ELISA); Biorad Monolisa LLOD 0.06 ng/mL (qualitative, ELISA); Abbott Alinity i NEXT LLOD 4.50 – 5.97 nIU/mL (NIBSC 00/588, 2003) (qualitative, CLIA); Abbott Alinity i v2.0 LLOD 0.02 – 0.021 IU/mL (NIBSC 00/588, 2003) (qualitative, CLIA); Abbott Alinity i QT LLOQ 0.05 IU/mL (quantitative, CMIA); Abbott Architect v2 LLOD 0.014 – 0.049 IU/mL; 0.05 IU/mL (NIBSC 00/588, 2003) (qualitative, CLIA); Abbott Architect QT LLOQ 0.05 IU/mL; (quantitative, CMIA); Roche Elecsys LLOQ 0.04 PE IU/mL (quantitative, CLIA); DiaSorin LIAISON® XL MUREX, HBsAg, LLOQ 0.05 IU/mL; 0.05 IU/mL (NIBSC 00/588, 2003) (quantitative, CLIA); DiaSorin Murex v3 (qualitative, ELISA)</p> |
|------------------------------------------------------------------------------------------------------------------------------------------------------------------------------------------------------------------------------------------------|---------------------------------------------------------------------------------------------------------------------------------------------------------------------------------------------------------------------------------------------------------------------------------------------------------------------------------------------------------------------------------------------------------------------------------------------------------------------------------------------------------------------------------------------------------------------------------------------------------------------------------------------------------------------------------------------------------------------------------------------------------------------------------------------------------------------------------------------------------------------------------------------------------------------------------------------|-----------------------------------------------------------------------------------------------------------------------------------------------------------------------------------------------------------------------------------------------------------------------------------------------------------------------------------------------------------------------------------------------------------------------------------------------------------------------------------------------------------------------------------------------------------------------------------------------------------------------------------------------------------------------------------------------------------------------------------------------------------------------------------------------------------------------------------------------------------------------------------------------------------------------------------------------------------------------------------------------------------------------------------------------------------------------------------------------------------------------------------------------------------------------------------------------------------------------------|------------------------------------------------------------------------------------------------------------------------------------------------------------------------------------------------------------------------------------------------------------------------------------------------------------------------------------------------------------------------------------------------------------------------------------------------------------------------------------------------------------------------------------------------------------------------------------------------------------------------------------------------------------------------------------------------------------------------------------------------------|

|  |                                                                                                                                                                                                                                                                                                                                                                                                                                                                                                                                                                                                                                                                                                               |  |  |
|--|---------------------------------------------------------------------------------------------------------------------------------------------------------------------------------------------------------------------------------------------------------------------------------------------------------------------------------------------------------------------------------------------------------------------------------------------------------------------------------------------------------------------------------------------------------------------------------------------------------------------------------------------------------------------------------------------------------------|--|--|
|  | <p>patients who are HBeAg-negative<sup>18,19,25</sup>;</p> <p>HBsAg loss is associated with better clinical outcome: less cirrhosis, HCC and mortality<sup>26</sup>; the predictive potential of HBsAg levels for the development of HCC is enhanced when combined with HBV DNA levels<sup>27-29</sup>;</p> <p>in patients who are HBeAg-negative with low viral loads, higher HBsAg levels independently predict HCC development<sup>30</sup>; minimal risk individuals can be predicted using: qHBsAg &lt; 1000 IU/mL + low HBV DNA (&lt;2000 IU/mL) plus normal ALT<sup>23,30,31</sup>;</p> <p>qHBsAg levels are excluded from most HCC prediction models except for the "REACH-B" model<sup>32</sup>;</p> |  |  |
|--|---------------------------------------------------------------------------------------------------------------------------------------------------------------------------------------------------------------------------------------------------------------------------------------------------------------------------------------------------------------------------------------------------------------------------------------------------------------------------------------------------------------------------------------------------------------------------------------------------------------------------------------------------------------------------------------------------------------|--|--|

**Anti-HBs**

|                                                                                                                                                                                                                                                               |                                                                                                                                                                                                                                                                                                                                                                                                          |                                                                                               |                                                                                                                                                                                                                                                                                                                                                                                                                                                                                                                           |
|---------------------------------------------------------------------------------------------------------------------------------------------------------------------------------------------------------------------------------------------------------------|----------------------------------------------------------------------------------------------------------------------------------------------------------------------------------------------------------------------------------------------------------------------------------------------------------------------------------------------------------------------------------------------------------|-----------------------------------------------------------------------------------------------|---------------------------------------------------------------------------------------------------------------------------------------------------------------------------------------------------------------------------------------------------------------------------------------------------------------------------------------------------------------------------------------------------------------------------------------------------------------------------------------------------------------------------|
| <p>Neutralizing antibodies directed against HBsAg; titres &gt; 10 mIU/ml correlate with protection following prophylactic vaccination; levels can be underestimated in CHB because of antigen-antibody complexes with high circulating HBsAg<sup>50</sup></p> | <p>Indicative of immunity to HBV following natural infection or vaccination and recovery of acute HBV infection; in occult HBV infection, anti-HBs seems to influence the risk of reactivation in case of immunosuppression<sup>51</sup>;</p> <p>immune complexes at baseline associated with ALT flare and functional cure on therapy, to date, findings are limited to HBV genotype A<sup>52</sup></p> | <p>Might or might not be present following HBV DNA and/or HBsAg loss following treatment.</p> | <p>Commercially available assays: Diasource LLOD 3.6 mIU/mL (qualitative, ELISA); Biorad Monolisa LLOD 2 mIU/mL (qualitative, ELISA); Roche Elecsys-anti-HBsII LLOD 2 IU/L; range 2 – 1000 IU/L; &lt; 10 IU/L non-reactive; ≥ 10 IU/L reactive (quantitative, ECLIA); Abbott Alinity i LLOD not specified ≥ 12.00 mIU/mL, grayzone ≥ 8.00 - &lt; 12.00 mIU/mL (qualitative, CMIA); Abbott Architect LLOQ not specified, reactive 10 mIU/mL (quantitative, CLIA); DiaSorin LIAISON® LLOD 3 mIU/mL (quantitative, CLIA)</p> |
|---------------------------------------------------------------------------------------------------------------------------------------------------------------------------------------------------------------------------------------------------------------|----------------------------------------------------------------------------------------------------------------------------------------------------------------------------------------------------------------------------------------------------------------------------------------------------------------------------------------------------------------------------------------------------------|-----------------------------------------------------------------------------------------------|---------------------------------------------------------------------------------------------------------------------------------------------------------------------------------------------------------------------------------------------------------------------------------------------------------------------------------------------------------------------------------------------------------------------------------------------------------------------------------------------------------------------------|

|  |  |  |  |
|--|--|--|--|
|  |  |  |  |
|--|--|--|--|

**Anti-HBc**

|                                                                           |                                                                                                                                                                                                                                                                                                                                                                                                         |                                                                                                                                                                                                                                                                                                                                                                                                                                                                                                                                                                                                   |                                                                                                                                                                                                                                                                                                                                                                                                                                                                                                                                                                                                                                                                                                                                                                                                                                  |
|---------------------------------------------------------------------------|---------------------------------------------------------------------------------------------------------------------------------------------------------------------------------------------------------------------------------------------------------------------------------------------------------------------------------------------------------------------------------------------------------|---------------------------------------------------------------------------------------------------------------------------------------------------------------------------------------------------------------------------------------------------------------------------------------------------------------------------------------------------------------------------------------------------------------------------------------------------------------------------------------------------------------------------------------------------------------------------------------------------|----------------------------------------------------------------------------------------------------------------------------------------------------------------------------------------------------------------------------------------------------------------------------------------------------------------------------------------------------------------------------------------------------------------------------------------------------------------------------------------------------------------------------------------------------------------------------------------------------------------------------------------------------------------------------------------------------------------------------------------------------------------------------------------------------------------------------------|
| <p>Non-neutralizing antibodies are directed against the viral capsid.</p> | <p>Biomarker of natural exposure to the virus; total anti-HBc is a marker of acute, chronic, and resolved HBV infection, or occult hepatitis B; anti-HBc IgM is detected during acute HBV infection and exacerbations of CHB; anti-HBc can be a predictor of liver inflammation, particularly when used together with serum HBsAg in patients who are HBeAg-positive or HBeAg-negative<sup>53</sup></p> | <p>Anti-HBc can predict HBV reactivation following immunosuppression<sup>51</sup>; anti-HBc measurement is recommended for diagnosis in patients suspected to have an acute exacerbation of CHB or to decide if patients who are planning to undergo immunosuppressive therapy will require prophylactic antiviral therapy<sup>1</sup>; quantitative anti-HBc (IgG or total) might be useful to better characterize the risk of reactivation after NUC discontinuation, the risk of HCC occurrence and that of HBV reactivation in HBsAg negative immunosuppressed individual<sup>54,55</sup></p> | <p>Anti-HBc total assays:<br/> Diasource LLOD 1.87 PE IU/mL (qualitative, ELISA);<br/> Biorad Monolisa LLOD 0.5 PE IU/mL for IgG and 8 PE IU/mL for IgM (qualitative, ELISA);<br/> Roche Elecsys LLOD 0.8 WHO IU/mL (qualitative, ECLIA);<br/> Abbott Alinity i LLOD 0.61 IU/mL (qualitative, CMIA);<br/> Abbott Alinity i v2 LLOD 0.54 – 0.56 IU/mL (qualitative, CMIA);<br/> Abbott Architect V2 LLOQ ≤1 PE IU/mL (quantitative, CMIA);<br/> DiaSorin LIAISON® LLOD 0.6 PE IU/mL (qualitative, CLIA);<br/> DiaSorin Murex (total) (qualitative, ELISA)</p> <hr/> <p>Anti-HBc IgM assays:<br/> Diasource LLOD 2.5 PE IU/mL (qualitative, ELISA); Biorad Monolisa LLOD 50 PE IU/mL (qualitative, ELISA); Roche Elecsys LLOD ≤3 PE IU/mL (qualitative, ECLIA); Abbott Architect LLOQ 0.4 – 0.5 PE IU/mL (quantitative, CMIA);</p> |
|---------------------------------------------------------------------------|---------------------------------------------------------------------------------------------------------------------------------------------------------------------------------------------------------------------------------------------------------------------------------------------------------------------------------------------------------------------------------------------------------|---------------------------------------------------------------------------------------------------------------------------------------------------------------------------------------------------------------------------------------------------------------------------------------------------------------------------------------------------------------------------------------------------------------------------------------------------------------------------------------------------------------------------------------------------------------------------------------------------|----------------------------------------------------------------------------------------------------------------------------------------------------------------------------------------------------------------------------------------------------------------------------------------------------------------------------------------------------------------------------------------------------------------------------------------------------------------------------------------------------------------------------------------------------------------------------------------------------------------------------------------------------------------------------------------------------------------------------------------------------------------------------------------------------------------------------------|

|  |  |  |                                                            |
|--|--|--|------------------------------------------------------------|
|  |  |  | DiaSorin LIAISON® LLOD 20<br>PE IU/mL (qualitative, CLIA); |
|--|--|--|------------------------------------------------------------|

<sup>a</sup>For details on the role of the markers in the viral life cycle and their expression during natural infection please refer to Yuen et al., 2018<sup>1</sup>

<sup>b</sup>The list of commercially available kits is far from exhaustive but represents the commonly used platforms or assays.

ALT: alanine aminotransferase; anti-HBc: antibody against HBcAg; anti-HBe: antibody against HBeAg; cccDNA: covalently closed circular DNA; CHB: chronic hepatitis B; CLEIA: chemiluminescent enzyme immunoassay; CLIA: chemiluminescent immunoassay; CMIA: chemiluminescent microparticle immunoassay; DNA: deoxyribonucleic acid; ECLIA: Electrochemiluminescence immunoassay; ELISA: enzyme-linked immunosorbent assay; HBcAg: hepatitis B core antigen (capsid protein); HBeAg: hepatitis B virus e antigen; HBsAg: hepatitis B s antigen (envelope protein); HBV: hepatitis B virus; HBx: hepatitis B x protein; HCC: hepatocellular carcinoma; IgG: immunoglobulin G; IgM: immunoglobulin M; IU: international units; LLOD: lower limit of detection; LLOQ: lower limit of quantitation; mRNA: messenger ribonucleic acid; NIBSC: National Institute for Biological Standards and Control; NUC/s: nucleos(t)ide analogue/s; PE: Paul Ehrlich; peg-IFN $\alpha$ : pegylated interferon- $\alpha$ ; pgRNA: pregenomic RNA; preC: precore; qHBsAg: quantitative hepatitis B s antigen; SMC5/6: structural maintenance of chromosomes; WHO: World Health Organization

- 1 Yuen, M. F. *et al.* Hepatitis B virus infection. *Nat Rev Dis Primers* **4**, 18035, doi:10.1038/nrdp.2018.35 (2018).
- 2 Chen, C. J., Yang, H. I., Iloeje, U. H. & Group, R.-H. S. Hepatitis B virus DNA levels and outcomes in chronic hepatitis B. *Hepatology* **49**, S72-84, doi:10.1002/hep.22884 (2009).
- 3 Boyd, A. *et al.* Decay of ccc-DNA marks persistence of intrahepatic viral DNA synthesis under tenofovir in HIV-HBV co-infected patients. *J Hepatol* **65**, 683-691, doi:10.1016/j.jhep.2016.05.014 (2016).
- 4 Hongthanakorn, C. *et al.* Virological breakthrough and resistance in patients with chronic hepatitis B receiving nucleos(t)ide analogues in clinical practice. *Hepatology* **53**, 1854-1863, doi:10.1002/hep.24318 (2011).
- 5 Kramvis, A., Kostaki, E. G., Hatzakis, A. & Paraskevis, D. Immunomodulatory Function of HBeAg Related to Short-Sighted Evolution, Transmissibility, and Clinical Manifestation of Hepatitis B Virus. *Front Microbiol* **9**, 2521, doi:10.3389/fmicb.2018.02521 (2018).
- 6 Milich, D. & Liang, T. J. Exploring the biological basis of hepatitis B e antigen in hepatitis B virus infection. *Hepatology* **38**, 1075-1086, doi:10.1053/jhep.2003.50453 (2003).
- 7 Ou, J. H. Molecular biology of hepatitis B virus e antigen. *Journal of gastroenterology and hepatology* **12**, S178-187, doi:10.1111/j.1440-1746.1997.tb00499.x (1997).
- 8 Gerlich, W. H., Glebe, D., Kramvis, A. & Magnusius, L. O. Peculiarities in the designations of hepatitis B virus genes, their products, and their antigenic specificities: a potential source of misunderstandings. *Virus genes* **56**, 109-119, doi:10.1007/s11262-020-01733-9 (2020).

- 9 European Association for the Study of the Liver. Electronic address, e. e. e. & European Association for the Study of the, L. EASL 2017 Clinical Practice Guidelines on the management of hepatitis B virus infection. *J Hepatol* **67**, 370-398, doi:10.1016/j.jhep.2017.03.021 (2017).
- 10 Fattovich, G., Bortolotti, F. & Donato, F. Natural history of chronic hepatitis B: special emphasis on disease progression and prognostic factors. *J Hepatol* **48**, 335-352, doi:10.1016/j.jhep.2007.11.011 (2008).
- 11 Suslov, A. *et al.* Transition to HBeAg-negative chronic hepatitis B virus infection is associated with reduced cccDNA transcriptional activity. *J Hepatol* **74**, 794-800, doi:10.1016/j.jhep.2020.11.003 (2021).
- 12 Hsu, Y. S. *et al.* Long-term outcome after spontaneous HBeAg seroconversion in patients with chronic hepatitis B. *Hepatology* **35**, 1522-1527, doi:10.1053/jhep.2002.33638 (2002).
- 13 Caviglia, G. P. *et al.* Quantitation of anti-HBe antibodies in anti-HBc-positive liver donors. *J Hepatol* **70**, 793-795, doi:10.1016/j.jhep.2018.11.023 (2019).
- 14 Peng, X. M. *et al.* High level of hepatitis B virus DNA after HBeAg-to-anti-HBe seroconversion is related to coexistence of mutations in its precore and basal core promoter. *World journal of gastroenterology* **11**, 3131-3134, doi:10.3748/wjg.v11.i20.3131 (2005).
- 15 Terrault, N. A. *et al.* Update on Prevention, Diagnosis, and Treatment of Chronic Hepatitis B: AASLD 2018 Hepatitis B Guidance. *Clin Liver Dis (Hoboken)* **12**, 33-34, doi:10.1002/cld.728 (2018).
- 16 Testoni, B., Levrero, M. & Zoulim, F. Challenges to a Cure for HBV Infection. *Seminars in liver disease* **37**, 231-242, doi:10.1055/s-0037-1606212 (2017).
- 17 Sommer, G. & Heise, T. Posttranscriptional control of HBV gene expression. *Frontiers in bioscience : a journal and virtual library* **13**, 5533-5547, doi:10.2741/3097 (2008).
- 18 Volz, T. *et al.* Impaired intrahepatic hepatitis B virus productivity contributes to low viremia in most HBeAg-negative patients. *Gastroenterology* **133**, 843-852, doi:10.1053/j.gastro.2007.06.057 (2007).
- 19 Wooddell, C. I. *et al.* RNAi-based treatment of chronically infected patients and chimpanzees reveals that integrated hepatitis B virus DNA is a source of HBsAg. *Sci Transl Med* **9**, doi:10.1126/scitranslmed.aan0241 (2017).
- 20 Tseng, T. C. *et al.* Serum hepatitis B surface antigen levels predict surface antigen loss in hepatitis B e antigen seroconverters. *Gastroenterology* **141**, 517-525, 525 e511-512, doi:10.1053/j.gastro.2011.04.046 (2011).
- 21 Wursthorn, K. *et al.* Kinetics of hepatitis B surface antigen decline during 3 years of telbivudine treatment in hepatitis B e antigen-positive patients. *Hepatology* **52**, 1611-1620, doi:10.1002/hep.23905 (2010).
- 22 Liu, J. *et al.* A predictive scoring system for the seroclearance of HBsAg in HBeAg-seronegative chronic hepatitis B patients with genotype B or C infection. *J Hepatol* **58**, 853-860, doi:10.1016/j.jhep.2012.12.006 (2013).
- 23 Hadziyannis, E. & Laras, A. Viral Biomarkers in Chronic HBeAg Negative HBV Infection. *Genes* **9**, doi:10.3390/genes9100469 (2018).
- 24 Cornberg, M. & Glebe, D. Editorial: which factors influence HBsAg levels in HBV-infected patients? *Alimentary pharmacology & therapeutics* **52**, 547-548, doi:10.1111/apt.15864 (2020).
- 25 Werle-Lapostolle, B. *et al.* Persistence of cccDNA during the natural history of chronic hepatitis B and decline during adefovir dipivoxil therapy. *Gastroenterology* **126**, 1750-1758, doi:10.1053/j.gastro.2004.03.018 (2004).

- 26 Anderson, R. T. *et al.* Association Between Seroclearance of Hepatitis B Surface Antigen and Long-term Clinical Outcomes of Patients With Chronic Hepatitis B Virus Infection: Systematic Review and Meta-analysis. *Clinical gastroenterology and hepatology : the official clinical practice journal of the American Gastroenterological Association* **19**, 463-472, doi:10.1016/j.cgh.2020.05.041 (2021).
- 27 Chan, S. L. & Yeo, W. Targeted therapy of hepatocellular carcinoma: present and future. *Journal of gastroenterology and hepatology* **27**, 862-872, doi:10.1111/j.1440-1746.2012.07096.x (2012).
- 28 Tseng, T. C. *et al.* Risk stratification of hepatocellular carcinoma in hepatitis B virus e antigen-negative carriers by combining viral biomarkers. *J Infect Dis* **208**, 584-593, doi:10.1093/infdis/jit209 (2013).
- 29 Yip, T. C. *et al.* HBsAg seroclearance further reduces hepatocellular carcinoma risk after complete viral suppression with nucleos(t)ide analogues. *J Hepatol* **70**, 361-370, doi:10.1016/j.jhep.2018.10.014 (2019).
- 30 Tseng, T. C. *et al.* High levels of hepatitis B surface antigen increase risk of hepatocellular carcinoma in patients with low HBV load. *Gastroenterology* **142**, 1140-1149 e1143; quiz e1113-1144, doi:10.1053/j.gastro.2012.02.007 (2012).
- 31 Liu, J. *et al.* Serum Levels of Hepatitis B Surface Antigen and DNA Can Predict Inactive Carriers With Low Risk of Disease Progression. *Hepatology* **64**, 381-389, doi:10.1002/hep.28552 (2016).
- 32 Voulgaris, T., Papatheodoridi, M., Lampertico, P. & Papatheodoridis, G. V. Clinical utility of hepatocellular carcinoma risk scores in chronic hepatitis B. *Liver international : official journal of the International Association for the Study of the Liver* **40**, 484-495, doi:10.1111/liv.14334 (2020).
- 33 Chan, H. L. *et al.* Serum hepatitis B surface antigen quantitation can reflect hepatitis B virus in the liver and predict treatment response. *Clinical gastroenterology and hepatology : the official clinical practice journal of the American Gastroenterological Association* **5**, 1462-1468, doi:10.1016/j.cgh.2007.09.005 (2007).
- 34 Lok, A. S., Zoulim, F., Dusheiko, G. & Ghany, M. G. Hepatitis B cure: From discovery to regulatory approval. *J Hepatol* **67**, 847-861, doi:10.1016/j.jhep.2017.05.008 (2017).
- 35 Lai, C. L. *et al.* Reduction of covalently closed circular DNA with long-term nucleos(t)ide analogue treatment in chronic hepatitis B. *J Hepatol* **66**, 275-281, doi:10.1016/j.jhep.2016.08.022 (2017).
- 36 Lebosse, F. *et al.* Quantification and epigenetic evaluation of the residual pool of hepatitis B covalently closed circular DNA in long-term nucleoside analogue-treated patients. *Scientific reports* **10**, 21097, doi:10.1038/s41598-020-78001-1 (2020).
- 37 Chen, C. H. *et al.* Long-term incidence and predictors of hepatitis B surface antigen loss after discontinuing nucleoside analogues in noncirrhotic chronic hepatitis B patients. *Clinical microbiology and infection : the official publication of the European Society of Clinical Microbiology and Infectious Diseases* **24**, 997-1003, doi:10.1016/j.cmi.2017.12.013 (2018).
- 38 Jeng, W. J., Chen, Y. C., Chien, R. N., Sheen, I. S. & Liaw, Y. F. Incidence and predictors of hepatitis B surface antigen seroclearance after cessation of nucleos(t)ide analogue therapy in hepatitis B e antigen-negative chronic hepatitis B. *Hepatology* **68**, 425-434, doi:10.1002/hep.29640 (2018).
- 39 van Bommel, F. *et al.* Response to discontinuation of long-term nucleos(t)ide analogue treatment in HBeAg negative patients: results of the Stop-NUC trial. *J Hepatol* **73**, S118 - S119 (2020).



- 40 Pfefferkorn, M. *et al.* Quantification of large and middle proteins of hepatitis B virus surface antigen (HBsAg) as a novel tool for the identification of inactive HBV carriers. *Gut* **67**, 2045-2053, doi:10.1136/gutjnl-2017-313811 (2018).
- 41 Pfefferkorn, M. *et al.* Composition of HBsAg is predictive of HBsAg loss during treatment in patients with HBeAg-positive chronic hepatitis B. *J Hepatol*, doi:10.1016/j.jhep.2020.08.039 (2020).
- 42 Belloni, L. *et al.* IFN-alpha inhibits HBV transcription and replication in cell culture and in humanized mice by targeting the epigenetic regulation of the nuclear cccDNA minichromosome. *The Journal of clinical investigation* **122**, 529-537, doi:10.1172/JCI58847 (2012).
- 43 Allweiss, L. *et al.* Immune cell responses are not required to induce substantial hepatitis B virus antigen decline during pegylated interferon-alpha administration. *J Hepatol* **60**, 500-507, doi:10.1016/j.jhep.2013.10.021 (2014).
- 44 Lucifora, J. *et al.* Specific and nonhepatotoxic degradation of nuclear hepatitis B virus cccDNA. *Science* **343**, 1221-1228, doi:10.1126/science.1243462 (2014).
- 45 Decorsiere, A. *et al.* Hepatitis B virus X protein identifies the Smc5/6 complex as a host restriction factor. *Nature* **531**, 386-389, doi:10.1038/nature17170 (2016).
- 46 Livingston, C. M., Ramakrishnan, D., Strubin, M., Fletcher, S. P. & Beran, R. K. Identifying and Characterizing Interplay between Hepatitis B Virus X Protein and Smc5/6. *Viruses* **9**, doi:10.3390/v9040069 (2017).
- 47 Tropberger, P. *et al.* Mapping of histone modifications in episomal HBV cccDNA uncovers an unusual chromatin organization amenable to epigenetic manipulation. *Proceedings of the National Academy of Sciences of the United States of America* **112**, E5715-5724, doi:10.1073/pnas.1518090112 (2015).
- 48 Allweiss, L. *et al.* Therapeutic shutdown of HBV transcripts promotes reappearance of the SMC5/6 complex and silencing of the viral genome in vivo. *Gut*, doi:10.1136/gutjnl-2020-322571 (2021).
- 49 Yuen, M. F. *et al.* RNA Interference Therapy With ARC-520 Results in Prolonged Hepatitis B Surface Antigen Response in Patients With Chronic Hepatitis B Infection. *Hepatology* **72**, 19-31, doi:10.1002/hep.31008 (2020).
- 50 Pancher, M. *et al.* Coexistence of circulating HBsAg and anti-HBs antibodies in chronic hepatitis B carriers is not a simple analytical artifact and does not influence HBsAg quantification. *Journal of clinical virology : the official publication of the Pan American Society for Clinical Virology* **62**, 32-37, doi:10.1016/j.jcv.2014.11.015 (2015).
- 51 Hollinger, F. B. & Sood, G. Occult hepatitis B virus infection: a covert operation. *Journal of viral hepatitis* **17**, 1-15, doi:10.1111/j.1365-2893.2009.01245.x (2010).
- 52 Xu, H. *et al.* Role of anti-HBs in functional cure of HBeAg+ chronic hepatitis B patients infected with HBV genotype A. *J Hepatol* **76**, 34-45, doi:10.1016/j.jhep.2021.07.031 (2022).
- 53 Zhang, Z. Q. *et al.* Quantitative Anti-HBc in Liver Pathological States in Patients with Chronic Hepatitis B Virus Infection. *Can J Infect Dis Med Microbiol* **2019**, 6545642, doi:10.1155/2019/6545642 (2019).
- 54 Caviglia, G. P. *et al.* Quantitation of HBV cccDNA in anti-HBc-positive liver donors by droplet digital PCR: A new tool to detect occult infection. *J Hepatol* **69**, 301-307, doi:10.1016/j.jhep.2018.03.021 (2018).
- 55 Yang, H. C. *et al.* Quantification of HBV core antibodies may help predict HBV reactivation in patients with lymphoma and resolved HBV infection. *J Hepatol* **69**, 286-292, doi:10.1016/j.jhep.2018.02.033 (2018).
